# Supplementary material for: Highly efficient white-electrophosphorescent devices based on polyfluorene copolymers containing charge-transporting pendent units
Source: Royal Society of Chemistry journal article supplement (doi:10.1039/b610111a), 2006-10-09
Supplement: b610111a.pdf [file b610111a.pdf]

## Supplementary data

### Highly Efficient White-Electrophosphorescent Devices Based on Polyfluorene Copolymers Containing Charge-Transporting Pendent Units

Fang-Iy Wu, Ping-I Shih, Ya-Hsien Tseng, and Ching-Fong Shu\*

Department of Applied Chemistry, National Chiao Tung University 300, Hsinchu, Taiwan

Yung-Liang Tung, and Yun Chi\*

Department of Chemistry, National Tsing Hua University 300, Hsinchu, Taiwan

**PF-TPA-OXD:**  $^1\text{H}$  NMR (300 MHz,  $\text{CDCl}_3$ ):  $\delta$  8.11-7.93 (10H, m), 7.84-7.51 (30H, m), 7.16-6.89 (24H, m), 2.54(8H, m), 2.04(8H, m), 1.57(8H, m), 1.40-1.24 (26H, m), 1.19-1.02 (40H, m), 0.89 (12H, t,  $J = 7.5$  Hz), 0.75-0.69 (20H, m).  $^{13}\text{C}$  NMR (75 MHz,  $\text{CDCl}_3$ ):  $\delta$  164.8, 164.1, 155.4, 152.9, 151.9, 151.8, 150.9, 149.3, 146.8, 145.4, 141.9, 141.1, 140.4, 140.3, 139.8, 139.1, 138.9, 138.6, 137.6, 129.1, 129.0, 128.9, 127.7, 127.4, 127.3, 126.8, 126.3, 126.1, 124.7, 123.0, 121.9, 121.4, 121.1, 120.9, 120.4, 120.1, 65.9, 64.8, 55.4, 40.4, 35.2, 35.1, 33.7, 31.8, 31.2, 30.0, 29.2, 23.9, 22.6, 22.4, 14.1, 14.0. Anal. Calcd. for  $\text{C}_{172}\text{H}_{186}\text{N}_6\text{O}_2$ : C, 87.19; N, 3.55; H, 7.91. Found: C, 86.27; N, 3.11; H, 7.73.

**Os(fpzz):** MS (FAB,  $^{192}\text{Os}$ ), observed  $m/z$  [assignment]: 892 [ $\text{M}^+$ ], 754 [ $\text{M}^+ - \text{PPhMe}_2$ ], 616 [ $\text{M}^+ - 2\text{PPhMe}_2$ ].  $^1\text{H}$  NMR (400 MHz,  $d_6$ -acetone):  $\delta$  10.31 (dd, 2H,  $J_{\text{HH}} = 6.6, 0.8$  Hz,  $\text{H}_{\text{py}}$ ), 7.56 ~ 7.48 (m, 4H,  $\text{H}_{\text{py}}$ ), 7.05 (ddd, 2H,  $J_{\text{HH}} = 6.8, 6.6, 0.8$  Hz,  $\text{H}_{\text{py}}$ ), 6.94 ~ 6.87 (m, 8H,  $\text{H}_{\text{Ph}}, \text{H}_{\text{pz}}$ ), 6.42 ~ 6.38 (m, 4H,  $\text{H}_{\text{Ph}}$ ), 0.80 (t, 6H,  $J_{\text{HP}} = 3.6$  Hz, Me), 0.60 (t, 6H,  $J_{\text{HP}} = 3.6$  Hz, Me).  $^{19}\text{F}$  NMR (470 MHz,  $d_6$ -acetone):  $\delta$  -59.5 (s).  $^{31}\text{P}$  NMR (202 MHz,  $d_6$ -acetone):  $\delta$  -19.6 (s). Anal. Calcd. For  $\text{C}_{34}\text{H}_{32}\text{F}_6\text{N}_6\text{P}_2\text{Os}$ : C, 45.84; N, 9.43; H, 3.62. Found: C, 46.00; N, 9.32; H, 3.81.
